# Supplementary material for: Targeted plasma metabolome response to variations in dietary glycemic load in a randomized, controlled, crossover feeding trial in healthy adults
Source: Royal Society of Chemistry journal article supplement (doi:10.1039/c5fo00287g), 2015-01-01
Supplement: c5fo00287g1.xlsx [file c5fo00287g1.xlsx]

## Sheet: Sheet1
METABOLITE	KEGG ID	HMDB ID	PubChem	CAS	METABOLIC PATHWAY
Inositol	C00137	HMDB00211	892	87-89-8	Glucose/inositol metabolism
2-Phosphoglyceric Acid	C00597	HMDB00362	59	2553-59-5	Glycolosis
Fructose 1 phosphate (F1P)	C01094	HMDB01076	10400369	15978-08-2	Glycolosis
Fructose 6 phosphate (F6P)	C00085	HMDB00124	69507	643-13-0	Glycolosis
Phosphoenolpyruvic Acid (PEP)	C00074	HMDB00263	1005	138-08-9	Glycolosis
Fructose 1,6 bi-phosphate (F16BP)	C00354	HMDB01058	172313	488-69-7	Glycolysis
Pyruvate	C00022	HMDB00243	1060	127-17-3	Glycolysis/amino acids metabolism
D-Glyceraldehyde-3-phosphate (D-GA3P)	C00661	HMDB01112	729	142-10-9	Glycolysis/Glycogenesis
Glucose 1,6 biphosphate (G16BP)	C01231	HMDB03514	82400	10139-18-1	Glycolysis/Glycogenesis
Dihydroxy acetone phosphate (DHAP)	C00111	HMDB01473	668	57-04-5	Glycolysis/phospholipid
Glucose	C00031	HMDB00122	79025	50-99-7	Glycolysis/sugar
Lactate	C001861	HMDB00190	612	79-33-4	Glycolysis/TCA
Aconitate	C02341	HMDB00958	444212	4023-65-8	TCA Cycle
Alpha-Ketoglutaric Acid	C00026	HMDB00208	51	328-50-7	TCA Cycle
Citric Acid	C00158	HMDB00094	311	77-92-9	TCA Cycle
Fumaric Acid	C00122	HMDB00134	444972	100-17-8	TCA Cycle
Malate	C00149	HMDB00156	525	6915-15-7	TCA Cycle
Maleic Acid	C01384	HMDB00176	444266	110-16-7	TCA Cycle
Malonic Acid	C00383	HMDB00691	867	141-82-2	TCA Cycle
Oxaloacetate	C00036	HMDB00223	970	328-42-7	TCA Cycle
Succinate	C00042	HMDB00254	1110	110-15-6	TCA Cycle
3-Hydroxykynurenine	C02794	HMDB00732	89	484-78-6	Tryptophan Cycle
5-Hydroxytryptophan	C01017	HMDB00472	144	4350-09-08	Tryptophan Cycle
L-Kynurenine	C00328	HMDB00684	161166	343-65-7	Tryptophan Cycle
Tryptophan (Try)	C00078	HMDB00929	6305	73-22-3	Tryptophan Cycle
Alanine (Ala)	C00041	HMDB00161	5950	56-41-7	Amino Acid
Arginine	C00062	HMDB00517	232	1119-34-2	Amino Acid
Asparagine (Asp)	C00152	HMDB00168	6267	70-47-3	Amino Acid
Glutamic acid (Glu A)	C00025	HMDB03339	611	56-86-0	Amino Acid
Glutamine (Glu)	C00303	HMDB00641	5961	56-85-9	Amino Acid
Glycine (Gly)	C00037	HMDB00123	750	56-40-6	Amino Acid
Histidine (His)	C00768	HMDB00177	6274	5934-29-2	Amino Acid
iso-Leucine (iso-Leu)	C00407	HMDB00172	791	73-32-5	Amino Acid
Leucine (Leu)	C00123	HMDB00687	6106	61-90-5	Amino Acid
Lysine (Lys)	C00047	HMDB00182	5962	56-87-1	Amino Acid
Methionine (Met)	C01733	HMDB00696	6137	63-68-3	Amino Acid
Phenylalanine	C02057	HMDB00159	6140	63-91-2	Amino Acid
Proline (Pro)	C00148	HMDB00162	145742	147-85-3	Amino Acid
Serine (Ser)	C00065	HMDB00187	5951	56-45-1	Amino Acid
Threonine (Thr)	C00188	HMDB00167	6288	72-19-5	Amino Acid
Tyrosine (Tyr)	C00082	HMDB00158	6057	60-18-4	Amino Acid
Valine (Val)	C00183	HMDB00883	6287	72-18-4	Amino Acid
N-AcetylGlycine	N/A	HMDB00532	10972	543-24-8	Amino Acid metabolism
gama-Aminobutyrate	C00334	HMDB00112	119	56-12-2	Amino Acid metabolism/Ala, Glu, Asp
Salicylurate	C07588	HMDB00840	10253	487-54-7	Amino Acid metabolism/Gly
Glycerate	C00258	HMDB00139	752	600-19-1	Amino Acid metabolism/Gly, Ser
Guanidinoacetate	C00581	HMDB00128	763	352-97-6	Amino Acid metabolism/Gly, Ser,Thr
MethylSuccinate	C08645	HMDB01844	10349	498-21-5	Amino Acid metabolism/Isoleu
D-Leucic Acid	C03264	HMDB00624	439960	20312-37-2	Amino Acid metabolism/Leu
Shikimic Acid	C00493	HMDB03070	8742	138-59-0	Amino Acid metabolism/Phe, Tyr,Trp
Anthranilate	C00108	HMDB01123	227	118-92-3	Amino Acid metabolism/Trp, Phe, Tyr
Kynurenate	C01717	HMDB00715	3845	492-27-3	Amino Acid metabolism/Try
Homogentisate	C00544	HMDB00130	780	451-13-8	Amino Acid metabolism/Tyr
Epinephrine	C00788	HMDB00068	5816	51-43-4	Amino Acid metabolism/Tyr,ligand
Normetanephrin	C05589	HMDB00819	1237	97-31-4	Amino Acid metabolism/Tyr,ligand
Citraconic Acid	C02226	HMDB00634	643798	498-23-7	Amino Acid metabolism/Val, Leu, IL
Aspartic Acid	C00049	HMDB00191	5960	56-84-8	Amino Acids
Cystine	C00491	HMDB00192	67678	56-89-3	Amino acids metabolism
Phosphotyrosine	C06501	HMDB06049	30819	N/A	Amino acids metabolism
Xanthurenate	C02470	HMDB00881	5699	59-00-7	Amino acids metabolism
Pantothenate	C00864	HMDB00210	6613	137-08-6	Amino acids metabolism/alanine, CoA
Creatine	C00300	HMDB00064	586	57-00-1	Amino acids metabolism/Arg, Gly
Creatinine	C00791	HMDB00562	588	60-27-5	Amino acids metabolism/Arg, Gly
Cystamine (Cys)	N/A	N/A	2915	51-85-4	Amino acids metabolism/Cys
Cystathionine	C00542	HMDB00099	439258	56-88-2	Amino acids metabolism/cys
Homocysteine	C00155	HMDB00742	778	454-29-5	Amino acids metabolism/Cys, Met
Aminolevulinate	C00430	HMDB01149	137	106-60-5	Amino acids metabolism/Gly, Thr,Ser
Betaine	C00719	HMDB00043	247	107-43-7	Amino acids metabolism/Gly,Ser, Thr metabolism
1-Methylhistamine	C05127	HMDB00898	3614	501-75-7	Amino acids metabolism/His
2-Aminoadipate	C00956	HMDB00510	469	542-32-5	Amino acids metabolism/Lys
Carnitine	C00487	HMDB00062	2724480	541-15-1	Amino acids metabolism/Lys
Phenylpyruvic acid (PPA)	C00166	HMDB00205	997	156-06-9	Amino acids metabolism/Phe
Hydroxyproline	C01015	HMDB00725	5810	51-35-4	Amino acids metabolism/Pro
Taurine (Tau)	C00245	HMDB00251	1123	107-35-7	Amino acids metabolism/Sulfur metabolism
Homoserine	C00263	HMDB00719	12647	672-15-1	Amino acids metabolism/Thr, Met, Asp
Homovanillate	C05582	HMDB00118	1738	306-08-1	Amino acids metabolism/Tyr,ligand
Aminoisobutyrate	C03284	HMDB03911	64956	144-90-1	Amino acids metabolism/Val, Leu, iso-Leu
Hydroxyphenylpyruvate	C01179	HMDB00707	979	156-39-8	Amino acids metabolites/phe, tyr
Pyroglutamic Acid	C01879	HMDB00267	7405	98-79-3	Amino acids/Glu
Glutaric Acid	C00489	HMDB00661	743	110-94-1	Amino Acids/lys, trp, fatty acids
Glucuronate	C00191	HMDB00127	444791	6556-12-03	Amino sugar and nucleotide sugar metabolism
Erythrose	C01796	HMDB02649	439574	1758-51-6	Sugar
Fructose	C00095	HMDB00660	5984	57-48-7	Sugar
Glyceraldehyde	C02426	HMDB01051	751	56-82-6	Sugar
Sorbitol	C00794	HMDB00247	107428	6706-59-8	Sugar
Sucrose	C00089	HMDB00258	5988	57-50-1	Sugar
Lactose	C00243	HMDB00186	84571	63-42-3	Sugar/Galactose
Galactose	C00124	HMDB33704	12003287	15572-79-9	Sugars
Biotin	C00120	HMDB00030	171548	58-85-5	Vitamins
Choline	C00114	HMDB00097	305	62-49-7	Vitamins
Dimethylglycine	C01026	HMDB00092	673	1118-68-9	Vitamins
Methylmalonate	C02170	HMDB00202	487	516-05-2	Vitamins
Niacinamide	C00153	HMDB01406	936	98-92-0	Vitamins
4-Pyridoxic acid	C00847	HMDB00017	6723	82-82-6	Vitamins/B6
Pyridoxal-5-P	C00018	HMDB01491	1051	54-47-7	Vitamins/B6
2 deoxycytidine diphosphate (DCDP)	C00705	HMDB01245	150855	800-73-7	Nucleotide/Pyrimidine metabolism
2'-Deoxyuridine	C00526	HMDB00012	13712	951-78-0	Nucleotide/Pyrimidine metabolism
Cytidine	C00475	HMDB00089	6175	65-46-3	Nucleotide/Pyrimidine metabolism
Orotate	C00295	HMDB00226	967	50887-69-9	Nucleotide/Pyrimidine metabolism
Orotidylic acid (OMP)	C01103	HMDB00218	160617	2149-82-8	Nucleotide/Pyrimidine metabolism
Uracil	C00106	HMDB00300	1174	66-22-8	Nucleotide/Pyrimidine metabolism
Uridine	C00299	HMDB00296	6029	58-96-8	Nucleotide/Pyrimidine metabolism
Uridine diphosphate (UDP)	C00015	HMDB00295	6031	21931-53-3	Nucleotide/Pyrimidine metabolism
Linoleic Acid	C01595	HMDB00673	5280450	60-33-3	Fatty acid metabolism
Linolenic Acid	C06427	HMDB01388	5280934	463-40-1	Fatty acid metabolism
Margaric Acid	N/A	HMDB02259	10465	506-12-7	Fatty acid metabolism
Myristic Acid	C06424	HMDB00806	11005	544-63-8	Fatty acid metabolism
Hippuric Acid	C01586	HMDB00714	464	495-69-2	Gut flora metabolism
Trimethylamine-N-oxide	C01104	HMDB00925	1145	1184-78-7	Gut flora metabolism / Redox
Allopurinol	D00224	HMDB14581	2094	315-30-0	Nucleotide metabolism (Drug)
Adenosine 3 phosphate (ATP)	C00002	HMDB00538	5957	51963-61-2	Nucleotide
Adenosine monophosphate (AMP)	C00020	HMDB00045	15938965	149022-20-8	Nucleotide
Cytosine (Cyt)	C00380	HMDB00630	597	71-30-7	Nucleotide
Histamine	C00388	HMDB00870	774	51-45-6	Nucleotide
Hypoxanthine	C00262	HMDB00157	790	68-94-0	Nucleotide
Xanthine	C00385	HMDB00292	1188	69-89-6	Nucleotide
Allantoin	C01551	HMDB00462	204	97-59-6	Nucleotide Degredation
1-Methyladenosine	C02494	HMDB03331	27476	15763-06-1	Nucleotide/Purine metabolism
1-Methylguanosine	C04545	HMDB01563	96373	2140-65-0	Nucleotide/Purine metabolism
Adenine	C00147	HMDB00034	190	73-24-5	Nucleotide/Purine metabolism
Adenosine	C00212	HMDB00050	60961	58-61-7	Nucleotide/Purine metabolism
Adenosine diphosphate (ADP)	C00008	HMDB01341	6022	20398-34-9	Nucleotide/Purine metabolism
Adenylosuccinate	C03794	HMDB00536	195	19046-78-7	Nucleotide/Purine metabolism
Guanosine	C00387	HMDB00133	6802	118-00-3	Nucleotide/Purine metabolism
Inosine	C00294	HMDB00195	6021	58-63-9	Nucleotide/Purine metabolism
Inosine monophosphate (IMP)	C00130	HMDB00175	8582	131-99-7	Nucleotide/Purine metabolism
N2,N2-Dimethylguanosine	N/A	HMDB04824	92919	2140-67-2	Nucleotide/Purine metabolism
Urate	C00366	HMDB00289	1175	69-93-2	Nucleotide/Purine metabolism
Xanthosine	C01762	HMDB00299	64959	146-80-5	Nucleotide/Purine metabolism
Deoxycytidylic acid (DCMP)	C00239	HMDB01202	13945	1032-65-1	Nucleotide/pyrimidine
Deoxyuridine 3 phosphate (DUTP)	C00460	HMDB01191	65070	1173-82-6	Nucleotide/pyrimidine
Deoxyuridylic acid (DUMP)	C00365	HMDB01409	65063	964-26-1	Nucleotide/pyrimidine
Thymidine 5 phosphate (DTMP)	C00364	HMDB01227	9700	365-07-1	Nucleotide/pyrimidine
Nicotinate (Niacin)	C00253	HMDB01488	938	59-67-6	Nicotinate and nicotinamide metabolism
Propionate	C00163	HMDB00237	1032	79-09-4	Nicotinate and nicotinamide metabolism
Gibberellin	C01699	HMDB03559	9819600	77-06-5	Diterpenoid biosynthesis
Oxalic Acid	C00209	HMDB02329	971	144-62-7	Glyoxylate and dicarboxylate metabolism
Mevalonate	C00418	HMDB00227	449	150-97-0	Terpenoid backbone biosynthesis
Geranyl Pyrophosphate	C00341	HMDB01285	445995	763-10-0	Ubiquinone and other terpenoid-quinone biosynthesis
Chenodeoxycholate	C02528	HMDB00518	10133	474-25-9	Bile acid metabolism
Glycochenodeoxycholate	C05466	HMDB00637	22833540	640-79-9	Bile acid metabolism
Glycocholate	C01921	HMDB00138	23617285	475-31-0	Bile acid metabolism
Adipic Acid	C06104	HMDB00448	196	124-04-9	Caprolactam degradation
Acetoacetate	C00164	HMDB00060	96	541-50-4	Ketone
PGE	C00584	HMDB01220	5280360	363-24-6	Lipids/Arachidonic acid metabolism
Glycerol-3-P	C00093	HMDB00126	754	29849-82-9	Lipids/Glycerollipid
Acetylcholine	C01996	HMDB00895	187	60-32-1	Lipids/phospholipids, ligand
Melatonin	C01598	HMDB01389	896	73-31-4	Neuroactive ligand
Folic Acid	C00504	HMDB00121	6037	59-30-3	One carbon pool by folate
3-Nitro-tyrosine	C03225	HMDB01904	65124	3604-79-3	Oxidative Damage
Reduced glutathione	C00051	HMDB00125	124886	70-18-8	Oxidative Damage
Ribose-5-P	C00117	HMDB01548	439167	3615-55-2	Pentose phosphate pathway
Ornithine	C01602	HMDB03374	6262	3184-13-2	Urea cycle
Citrulline	C00327	HMDB00904	833	372-75-8	Urea Cycle
ATP
